# Supplementary material for: Prioritization of a plant polysaccharide over a mucus carbohydrate is enforced by a Bacteroides hybrid two-component system
Source: Mol Microbiol. 2012 Jul 5;85(3):478–91. doi: 10.1111/j.1365-2958.2012.08123.x (PMC3404733; doi:10.1111/j.1365-2958.2012.08123.x)
Supplement: Supplementary file 1 [file mmi0085-0478-SD1.pdf]

## **Supporting Information**

### **Prioritization of a Plant Polysaccharide over a Mucus Carbohydrate is Enforced by a Bacteroides Hybrid Two-Component System**

Jonathan B. Lynch, and Justin L. Sonnenburg

Department of Microbiology and Immunology, Stanford University School of Medicine  
Stanford, California, 94305

For correspondence:

Email. [jsonnenburg@stanford.edu](mailto:jsonnenburg@stanford.edu)

Tel. 650-721-1510

Fax. 650-498-7147

**Fig. S1. Growth curves of *Bt*, *Bt-ΔBT1754*, and *Bt-ΔBT0366* strains in various carbohydrates.**

*Bt*, *Bt-ΔBT1754*, and *Bt-ΔBT0366* strains were grown in MM supplemented with 0.5% final concentration of the noted carbohydrates. Absorbance measurements were taken at 600nm (OD<sub>600</sub>). Values shown are mean of triplicates of each condition.

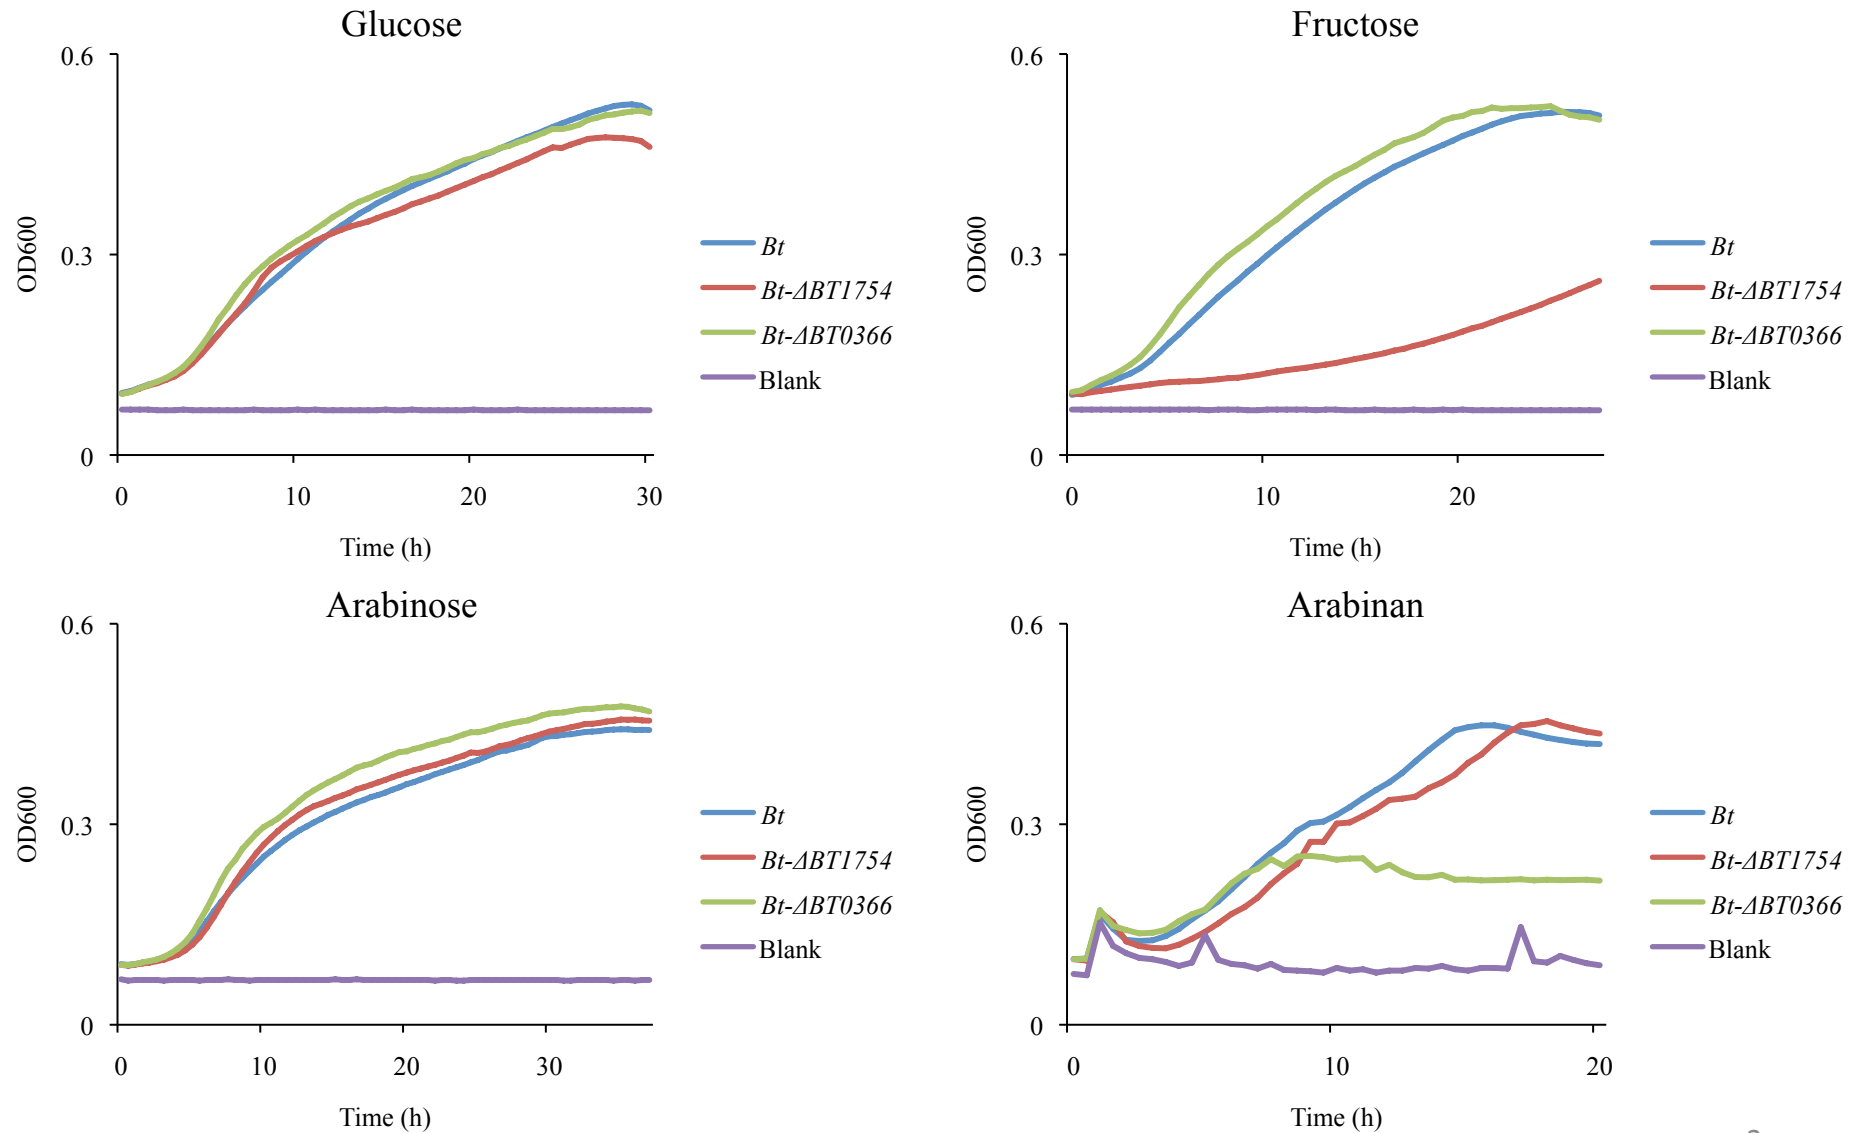

**Fig. S2. Deletion of *BT1754* prevents up regulation of the *BT1754*-associated operon during growth in fructose.** *Bt* and *Bt-ΔBT1754* were grown in MM supplemented with fructose, arabinan, or both, and expression of the *BT1754*-associated fructokinase *BT1757* was assessed by qRT-PCR. Values shown are mean fold change over *Bt* grown in MM-arabinan. Error bars are +/- SE.

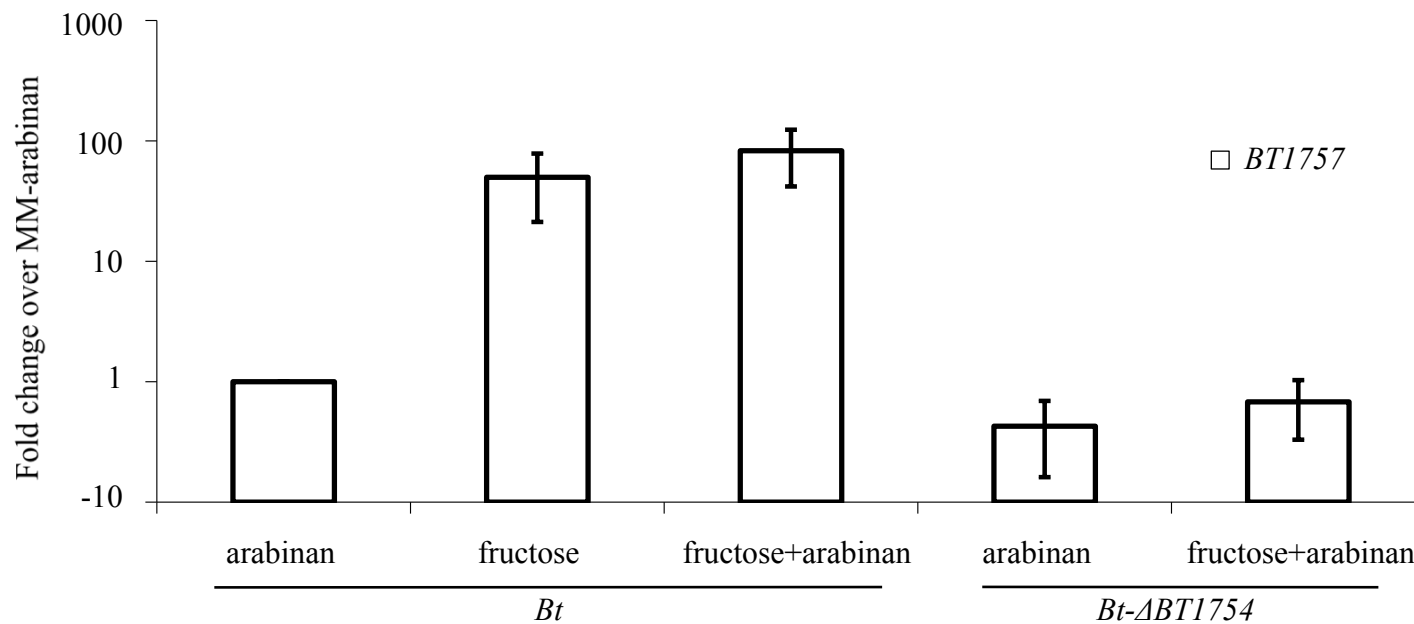

**Fig. S3. The *BT1754/BT0366* chimera does not affect *BT1754*-associated genes.**

Relative expression of the *BT1754*-associated PUL gene, *BT1757*, in *Bt*, *Bt-ΔBT1754*, and *Bt-ΔBT1754-BT1754/BT0366* grown in MM supplemented with fructose, arabinose, or both; assessed by qRT-PCR. Values represent mean fold change in expression over *Bt* grown in MM-arabinose. Error bars are +/- SE.

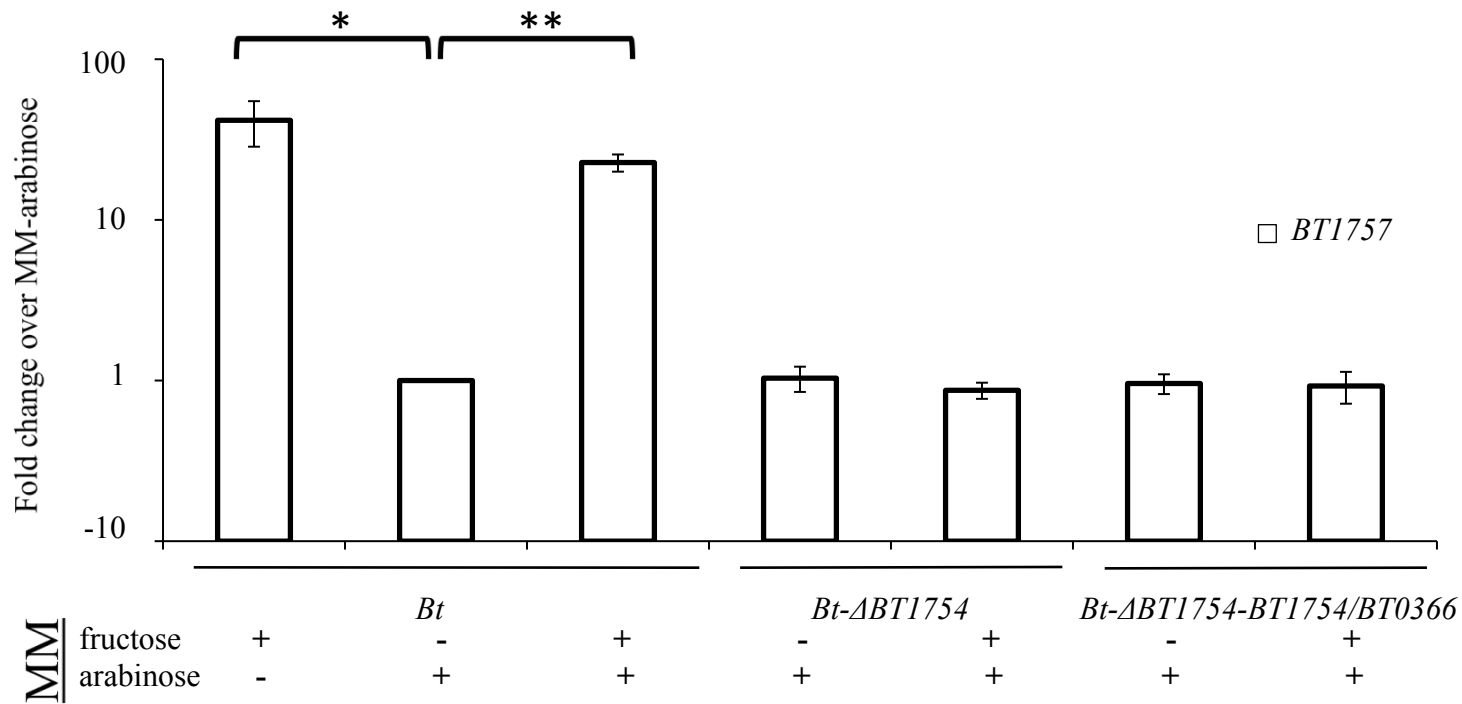

Table S1. List of BT0366 binding loci. Chromatin Immunoprecipitation followed by high throughput sequencing (ChIP-seq) was used to enrich for BT0366 binding loci using an antibody against the periplasmic domain of BT1754 in the *Bt-ΔBT1754-BT1754/BT0366* strain. Enrichment was determined via comparison with sequences derived from the same immunoprecipitation performed in the *Bt* strain. Datasets were analyzed with CLC Genomics Workbench using the ChIP-seq toolkit.

| Genomic coordinates | False discovery % | Gene name                       |
|---------------------|-------------------|---------------------------------|
| 431842-431855       | 1.7e-3            | BT0359-BT0360 intergenic region |
| 1973275-1973282     | 1.35e-13          | BT1602-BT1603 intergenic region |
| 2336929-2336949     | 1.58e-4           | BT1862-5S intergenic region     |
| 2345070-2345092     | 4.71e-18          | BT1866-BT1867 intergenic region |
| 2993445-2993459     | 0.03              | BT2397-BT2398 intergenic region |
| 3190619-3190676     | 1.6e-15           | BT2557-BT2558 intergenic region |
| 3192445-3192449     | 2.56e-9           | BT2558-BT2559 intergenic region |
| 4399596-4399610     | 6.37e-4           | BT3415                          |
| 4484457-4484472     | 1.6e-10           | BT3478-BT3479 intergenic region |
| 4709598-4709605     | 4.01e-10          | BT3633-BT3634 intergenic region |
| 4816848-4816869     | 6.86e-6           | SusR-BT3706 intergenic region   |
| 4930604-4930612     | 8.06e-13          | BT3794-BT3795 intergenic region |
| 4976427-4976442     | 3.77e-21          | BT3824-BT3825 intergenic region |
| 5439702-5439710     | 1.89e-8           | BT4143-BT4144 intergenic region |
| 5650981-5650988     | 2.43e-5           | BT4289-BT4290 intergenic region |
| 5784589-5784597     | 4.89e-10          | BT4391-BT4392 intergenic region |
| 5999278-5999322     | 5.73e-6           | BT4579-BT4580 intergenic region |
| 6220119-6220127     | 4.82e-14          | BT4740-BT4741 intergenic region |

Table S2. List of BT1754 binding loci. Chromatin Immunoprecipitation followed by high throughput sequencing (ChIP-seq) was used to enrich for BT1754 binding loci using an antibody against the periplasmic domain of BT1754 in the *Bt* strain. Enrichment was determined via comparison with sequences derived from the same immunoprecipitation performed in the *Bt-ΔBT1754-BT1754/BT0366* strain. Datasets were analyzed with CLC Genomics Workbench using the ChIP-seq toolkit.

| Genomic coordinates | False discovery % | Gene name                       |
|---------------------|-------------------|---------------------------------|
| 2165495-2165595     | 0.00              | BT1754                          |
| 4399582-4399606     | 2.68e-24          | BT3415                          |
| 5439720-5439726     | 4.3e-8            | BT4143-BT4144 intergenic region |

Table S3. Strains referenced in this paper

| Name                                                   | Description                                                                                                                     | Reference                         |
|--------------------------------------------------------|---------------------------------------------------------------------------------------------------------------------------------|-----------------------------------|
| <i>Bt</i>                                              | Parent <i>Bt</i> strain VPI-5482 $\Delta tdk$                                                                                   | (Koropatkin <i>et al.</i> , 2008) |
| <i>Bt-<math>\Delta</math>BT0366</i>                    | Parent w/ in frame deletion of HTCS <i>BT0366</i>                                                                               | This paper                        |
| <i>Bt-<math>\Delta</math>BT1754</i>                    | Parent w/ in-frame deletion of HTCS <i>BT1754</i>                                                                               | (Sonnenburg <i>et al.</i> , 2010) |
| <i>Bt-BT1754/BT0366</i>                                | Parent containing <i>BT1754/BT0366</i> chimera integrated next to genomic Ser-tRNA <sub>UGA</sub> site                          | This paper                        |
| <i>Bt-<math>\Delta</math>BT1754-<br/>BT1754/BT0366</i> | <i>Bt-<math>\Delta</math>BT1754</i> strain with <i>BT1754/BT0366</i> chimera integrated at genomic Ser-tRNA <sub>UGA</sub> site | This paper                        |

Table S4. Cloning primers used in this paper

| Primer name                  | Sequence                                                     |
|------------------------------|--------------------------------------------------------------|
| BT1754 forward primary       | GGAAACGCTACACTATTGATGGTAAA                                   |
| BT1754/BT0366 sewing reverse | TTCTAACAGATGCTTTTGCTGTTCAAGCTCTTTATTCAAGCGA<br>TTCTTAG       |
| BT0366 reverse primary       | CCCAATCCTGACAAGAACTCAT                                       |
| BT1754/BT0366 sewing forward | CTAAGAATCGCTTGAATAAAGAGCTTGAACAGCAAAAGCAT<br>CTGTTAGAA       |
| BT1754 forward secondary     | GAAAAGGAATGGGATCCAAACTAA                                     |
| BT0366 reverse secondary     | GCTGAGAACGTCTAGAATTGCCAT                                     |
| 0366FragAfwrđ                | CTGTTTGATCTGTTCCGGAGAC                                       |
| 0366sewR                     | GCCCTTATTAATACGTACATATATATGTAAGTATATAAGGG<br>TTGCTATTATGAAAC |
| 0366sewF                     | GTTTCATAATAGCAACCCTTATATCAGTTACATATATGCACG<br>TATTAATAAGGGGC |
| 0366FragBrev                 | TTATTTGATTCTTTTTTCCCCAGAC                                    |
| 0366F. secondary             | CCCGGATCGGGATCCCCCAGTCG                                      |
| 0366R.secondary              | GTTTCCTTCACCGTCTAGAAAAGACGGC                                 |

Table S5. qRT-PCR primers used in this paper

|           |                            |
|-----------|----------------------------|
| BT16S-F4  | GTGTAGCGGTGAAATGCTTAGATATC |
| BT16S-R4  | CAGTGTCAGTTGCAGTCCAGTGA    |
| BT1757-1F | ATGGGATAACATTCCTTTCACG     |
| BT1757-1R | AGACTCGCGCAATACTTCTTTC     |
| BT1763-1F | AGTAGGCAAACATCGTGGAGAT     |
| BT1763-1R | GAGCGAGTGAATACCCCTCAC      |
| BT0360.1F | GTCAAACGGGGATTCTGCTA       |
| BT0360.1R | GTTGGCAAGGTTCCAGTCAT       |
| BT0365.1F | CCGCACAAAATGAGAAAGGT       |
| BT0365.1R | GCCGATACTGTCCATGAGT        |
| BT4294aF  | TAGACTCCACCCGAAAATGC       |
| BT4294aR  | TGCATATCTTTGGCAGCTTG       |
| BT4299aF  | GGCAAAGCAGGAAGTGACTC       |
| BT4299aR  | AGCCCTTCCCGTTCATAACT       |
| BT4404aF  | CTATTCTGAGCGGACCTTCG       |
| BT4404aR  | AGTTGGTTCCGGTGTTGAAG       |
| BT4406aF  | GCGGTAAGATCACGGTTTGT       |
| BT4406aR  | CTGCGATATGGTCTTCAGCA       |
